# Supplementary material for: Iridium-catalyzed growth of single-walled carbon nanotubes with a bicentric diameter distribution
Source: Royal Society of Chemistry journal article supplement (doi:10.1039/c9qm00267g), 2019-01-01
Supplement: c9qm00267g1.pdf [file c9qm00267g1.pdf]

## Electronic Supporting Information

### **Iridium-Catalyzed Growth of Single-Walled Carbon Nanotubes with a Bicentric Diameter Distribution**

*Han Xue<sup>1</sup>, Liantao Xin<sup>2</sup>, Ziwei Xu<sup>3\*</sup>, Ruiqin Bai<sup>1</sup>, Qianru Wu<sup>1</sup>, Benwu Xin<sup>1</sup>, Xiuyun Zhang<sup>4</sup>, Hongzhi Cui<sup>1\*</sup>, Fushan Chen<sup>5</sup>, Maoshuai He<sup>1,2\*</sup>*

1 School of Materials Science and Engineering, Shandong University of Science and Technology, Qingdao 266590, China

2 Key Laboratory of Eco-Chemical Engineering, Ministry of Education, Taishan Scholar Advantage and Characteristic Discipline Team of Eco Chemical Process and Technology, College of Chemistry and Molecular Engineering, Qingdao University of Science and Technology, Qingdao 266042, China

3 School of Materials Science and Engineering, Jiangsu University, Zhenjiang 212013, China

4 College of Physics Science and Technology, Yangzhou University, Yangzhou 225002, China

5 College of Marine Science and Biological Engineering, Qingdao University of Science and Technology, Qingdao 266042, China

#### Content of Supporting Information

**Figure S1.** TEM characterization results of Ir nanoparticles.

**Figure S2.** Diameter distribution of Ir nanoparticles determined by AFM.

**Figure S3.** AFM images of SWNTs grown on Ir catalyst.

**Figure S4.** High frequency modes of SWNTs in the Raman spectra.

**Figure S5.** Evidences for perpendicular mode of SWNT growth.

**Figure S6.** SWNT-Ir catalyst interfaces.

Corresponding authors: hemaoshuai@qust.edu.cn (He, M); ziweixu2014@ujs.edu.cn (Xu, Z)  
cuihongzhi1965@163.com (Cui, H)

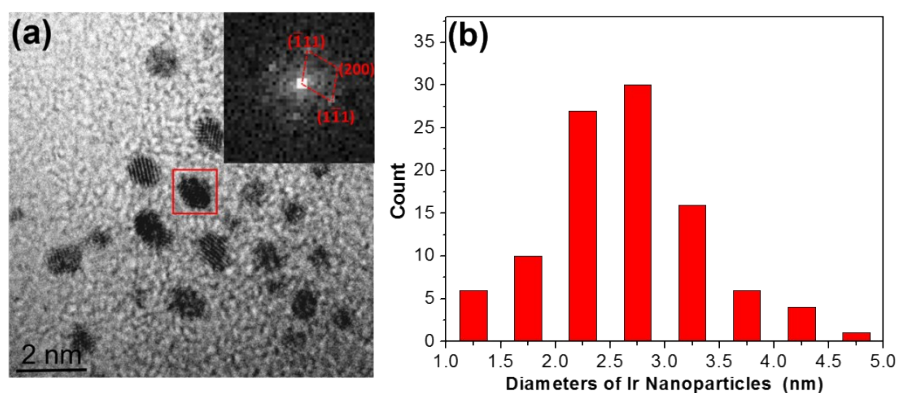

**Figure S1.** (a) A TEM overview of Ir nanoparticles. Inset is the FFT pattern of the marked Ir nanoparticle. (b) The diameter distribution of the Ir nanoparticles measured by TEM.

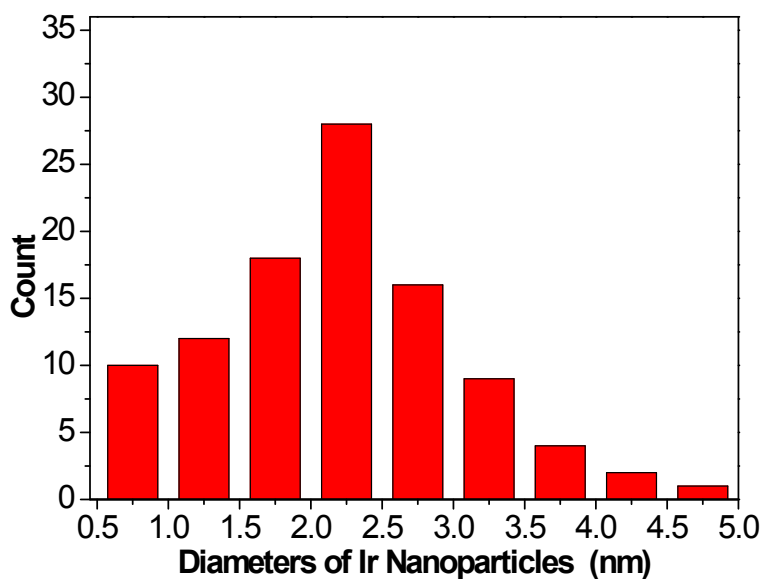

**Figure S2.** The diameter distribution of the Ir nanoparticles measured by AFM images.

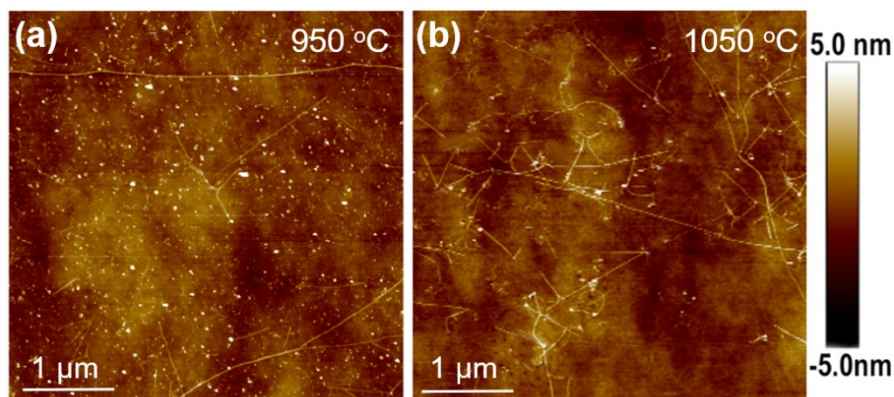

**Figure S3.** AFM images of the SWNTs grown from Ir nanoparticles at (a) 950 °C, (b) 1050 °C.

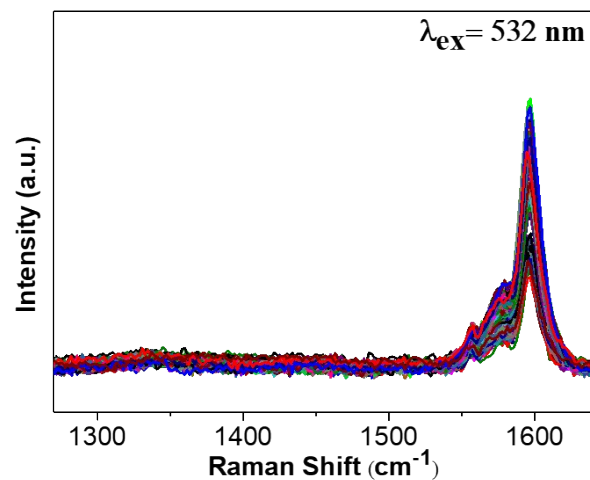

**Figure S4.** The high frequency modes in Raman spectra of SWNTs acquired with 532 nm laser.

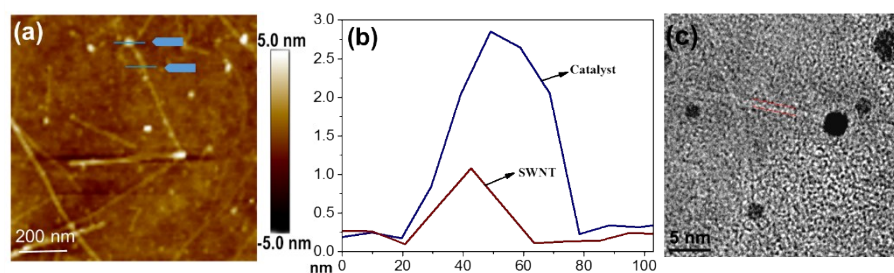

**Figure S5.** (a) AFM image of SWNTs. (b) Height measurement of an SWNT and its catalyst particle (indicated by arrows). (c) TEM image of SWNTs grown from Ir nanoparticles by a perpendicular mode. The tube walls are highlighted by red lines.

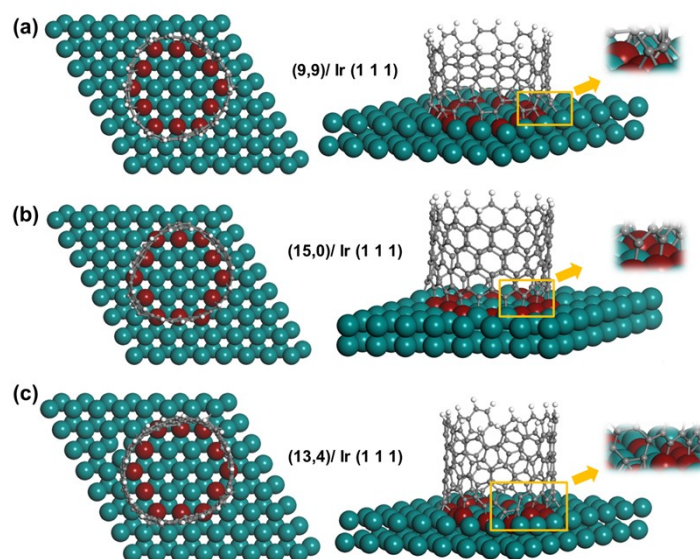

**Figure S6.** Top views (left) and side views (right) of SWNT segments with different chiralities anchored on Ir (111) surface. (a) (9, 9)/Ir (111). (b) (15, 0)/Ir (111). (c) (13, 4)/Ir (111). The SWNT-catalyst interfaces in yellow rectangles are enlarged in the right insets. White, gray and green balls represent hydrogen, carbon and Ir atoms, respectively. The interfacial Ir atoms are highlighted by red.
